# Supplementary material for: Ni single-atom catalysts for highly efficient electrocatalytic CO2 reduction: hierarchical porous carbon as a support and plasma modification
Source: Royal Society of Chemistry journal article supplement (doi:10.1039/d3se00858d), 2023-12-04
Supplement: d3se00858d1.pdf [file d3se00858d1.pdf]

# Ni single-atom catalysts for highly efficient electrocatalytic CO<sub>2</sub> reduction: hierarchical porous carbon as a support and plasma modification

Qiulin Ye<sup>a</sup>, Yaqi Peng<sup>a\*</sup>, Dongdong Wang<sup>a</sup>, Jiabao Lv<sup>a</sup>, Yaoyue Yang<sup>b</sup>, Yue Liu<sup>b</sup>, Zhifu Qi<sup>c</sup>, Songqiang Zhu<sup>c</sup>, Chunliang Ge<sup>d</sup>, Yan Yang<sup>d</sup>, Angjian Wu<sup>a,c\*</sup>, Shengyong Lu<sup>a\*</sup>

## Characterization of Ni-SACs/NHPC

The field-emission scanning electron microscopy (SEM, SU-8010, Hitachi), transmission electron microscopy (TEM, Tecnai G2 F20, FEI) and high-angle annular dark-field scanning transmission electron microscope (HAADF-STEM, Themis Z, FEI) were used to investigate the morphology and structure characteristics of the prepared Ni-SA/NHPC catalyst. Brunauer-Emmett-Teller (BET) specific surface area and pore distribution were measured on Kangta Q3 with N<sub>2</sub> adsorption/desorption test. The crystal structure of the catalyst was analyzed by the X-ray powder diffraction (XRD) using Ultima IV with Cu K $\alpha$  radiation at 3 KW. X-ray photoelectron spectroscopy (XPS) was carried out via Thermo Scientific K-Alpha using Al K $\alpha$  radiation (1486.6eV). X-ray absorption near edge structure (XANES) and extended X-ray

---

<sup>a</sup> State Key Laboratory of Clean Energy Utilization, Zhejiang University, Hangzhou, 310027, P. R. China

\* Corresponding author.

E-mail address: pengyaqi@zju.edu.cn, wuaj@zju.edu.cn (A.J. Wu), lushy@zju.edu.cn

<sup>b</sup> Key Laboratory of Basic Chemistry of the State Ethnic Commission, School of Chemistry and Environment, Southwest Minzu University, Chengdu 610041, Sichuan Province, China

<sup>c</sup> Baima Lake Laboratory, Hangzhou, 310053, P. R. China

<sup>d</sup> Zhejiang Tiandi Environmental Protection Technology Co., Ltd., Hangzhou 310012, China

absorption fine structure (EXAFS) of the Ni K-edge were performed at the 1W1B station in Beijing Synchrotron Radiation Facility (BSRF), China, with Ni foil and NiO used as references. The Ni loading weight was measured using inductively coupled plasma mass spectroscopy (ICP-MS, Agilent 7800). Atomic force microscopy (AFM, Dimension Icon, Bruker Nano INC) was carried out to observe the roughness change of carbon substrate treated by plasma. In situ ATR-SEIRAS was measured in a homemade optical setup. It should be ensured that the infrared radiation can penetrate the Si prism into the interface boundary of the Si/Au/IR film at an incidence angle of about  $70^\circ$ , and then reflect the infrared beam into the liquid nitrogen cooled mercury cadmium telluride detector of the Agilent Cary 660 FTIR spectrometer. High-purity  $\text{CO}_2$  was bubbled into the electrolyte at a determined flow rate of about 30 standard cubic centimeters per minute (sccm) to ensure that  $\text{CO}_2$  molecules are introduced into the catalyst surface at the same rate. All the spectra were given in absorption units defined as  $A = -\log(R/R_0)$ , where R and  $R_0$  represent the reflected IR intensities corresponding to the sample- and reference-single beam spectrum, respectively.

### **Electrochemical $\text{CO}_2$ -to CO conversion evaluation in a H-type cell**

The electrochemical experiments were performed in a sealed H-cell separated by a Nafion 117 membrane, while the electrocatalytic activity was evaluated using a CHI 760E workstation without iR compensation. The working electrode was prepared by spraying the mixture of Ni-SACs/NHPC, isopropyl alcohol and Nafion solution (5 wt.%) on carbon paper. A platinum foil and Ag/AgCl filled with saturated KCl were used as the counter electrode and reference electrode, respectively. In a typical reaction

process, high-purity CO<sub>2</sub> (99.999%) was continuously purged into the cathodic cell (0.1 M KHCO<sub>3</sub> electrolyte) with a set gas flow rate of 30 mL/min. The gas chromatograph (GC, 9790Plus, Fuli) equipped with a thermal conductivity detector (TCD) for H<sub>2</sub> and a flame ionization detector (FID) for CO was used to detect and quantify products after a stable CO<sub>2</sub> electrolysis experiment after 1 h. The liquid products were analyzed by <sup>1</sup>H NMR on a Bruker 600 MHz NMR spectrometer using dimethyl sulphoxide (DMSO) as an internal standard.

All potentials measured by Ag/AgCl electrode were converted to the RHE reference scale using the following equation:  $E_{RHE} = E_{Ag/AgCl} + 0.0591V \times pH + 0.197V$ . The Faradaic efficiency (FE) of various products was calculated as follows:

$$FE(\%) = \frac{anF}{Q} \times 100\% \quad (1)$$

$$j_{CO} = j_{total} \times FE \quad (2)$$

Where  $a$  was the number of electrons transferred;  $n$  was the number of moles for a given product;  $F$  was the Faraday's constant (96485 C/mol);  $Q$  was all the charge passed throughout the electrolysis process.  $j_{total}$  was the total current density while  $j_{CO}$  was the partial current density of CO.

### **Electrochemical CO<sub>2</sub>-to CO conversion evaluation in a flow cell**

The electrochemical experiments were conducted in a three-chamber (gas, cathodic and anodic chambers) flow cell. CO<sub>2</sub> electrolysis was conducted under different current densities using CHI 1140e electrochemical workstation. CO<sub>2</sub> was supplied directly to the catalyst layer in the gas compartment while 1M KHCO<sub>3</sub> as catholyte and 1M KHCO<sub>3</sub> as anolyte were circulated between the corresponding

chamber and the electrolyte supply bottle, respectively, through a peristaltic pump. The CO<sub>2</sub> inlet gas flow rate was controlled using a mass flow controller and set to 30 sccm, and the mixed gas flow rate at the outlet of the reactor was measured using a soap film flow meter. Ag/AgCl filled with saturated KCl as a reference electrode was placed in the catholyte chamber near to the cathode GDE to decrease the solution resistance. The anode GDE was consisted of iridium oxide supported on titanium mesh (IrOx/Ti mesh), prepared by a dip-coating and thermal decomposition method. An anion exchanged membrane (AEM, Fumasep, FAB-PK-130) was adopted to separate the catholyte chamber and anolyte chamber. It should be noted that iR correction was not performed.

### **DFT simulation**

Density functional theory (DFT) calculations were performed on a  $3 \times 3 \times 1$  slab model of Ni single-atom catalyst. All the DFT calculations were calculated by using the “Vienna ab initio simulation package” (VASP) using the projector augmented wave (PAW) method with the theoretical basis of density functional theory (DFT)<sup>1</sup>. The slab model was built with 15 Å of vacuum to avoid interlayer interactions and spin polarization was considered. Generalized gradient approximation (GGA) with Perdew, Burke, and Ernzerhof (PBE) was used for the exchange-correlation energy<sup>2</sup>.  $3 \times 3 \times 1$  Monkhorst–Pack mesh used for k-point were set in the first Brillouin zone. The cut-off energy for the plane-wave basis was set as 400 eV and a Fermi-level smearing of 0.1 eV. The convergence criteria for total energy and the Hellman-Feynman force were set as  $10^{-6}$  eV and  $-0.05$  eV/Å, respectively. The absorption energy ( $E_{\text{ads}}$ ) was defined as:

$$E_{\text{ads}} = E_{\text{slab}} + E_{\text{mol}} - E_{\text{total}} \quad (1)$$

Where the  $E_{\text{slab}}$  represented the energy of the isolated slab module,  $E_{\text{mol}}$  represented the energy of isolated molecule, and  $E_{\text{total}}$ , represented the energy of the species-absorbed system. The reaction can be divided into the following reactions:

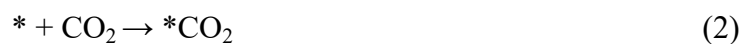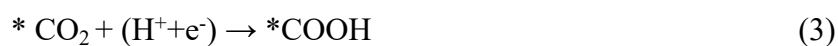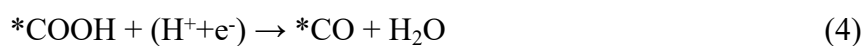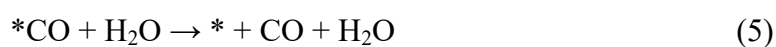

The Gibbs free energy change ( $\Delta G$ ) can be calculated as follows:

$$\Delta G = \Delta E + \Delta \text{ZPE} - T\Delta S \quad (6)$$

Where  $\Delta E$  represented the electronic energy,  $\Delta \text{ZPE}$  represented the zero-point energy,  $T$  and  $\Delta S$  represented the temperature (298.15K) and change of entropy calculated by Vaspkit<sup>3</sup>.

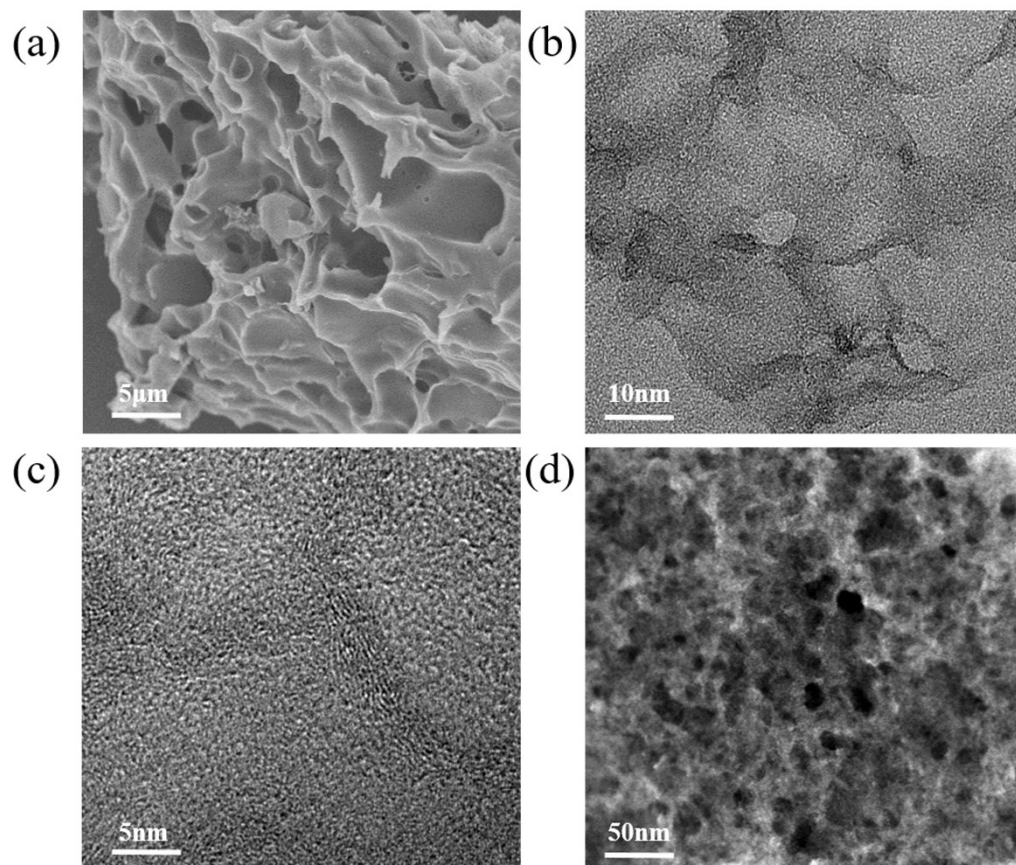

**Fig. S1.** (a)The SEM, (b)TEM, (c)HRTEM and (d)HAADF-STEM images of the Ni-SACs/NHPC.

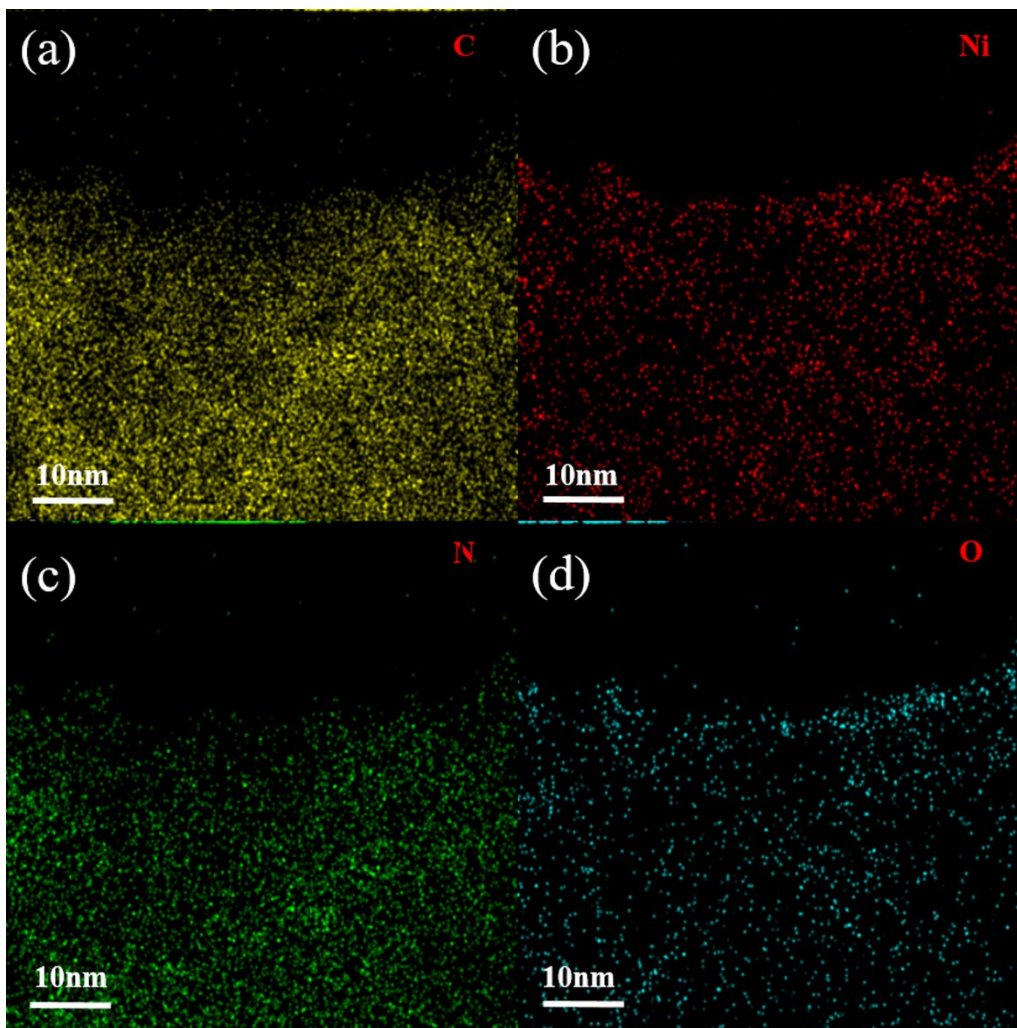

**Fig. S2.** The corresponding EDS mapping of Ni-SACs/NHPC.

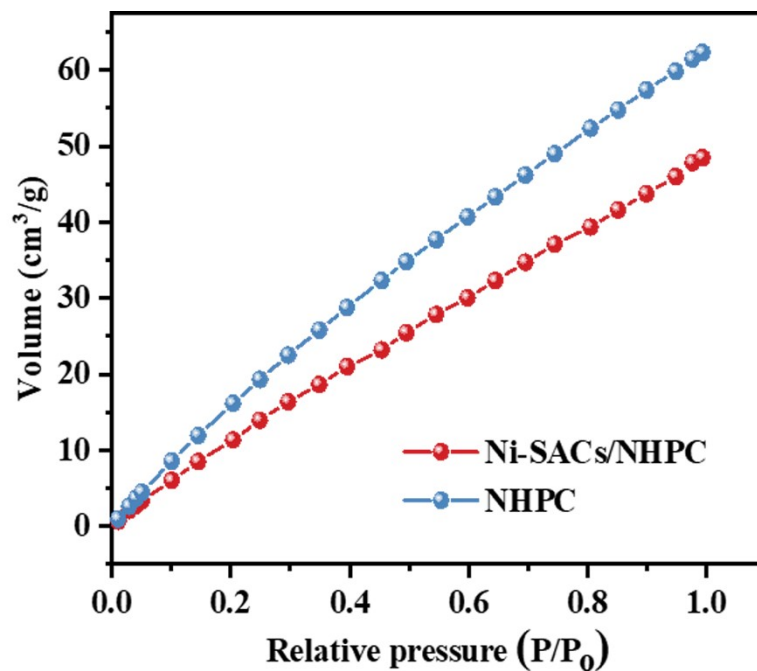

**Fig. S3.** CO<sub>2</sub> adsorption isotherm for Ni-SACs/NHPC.

**Table S1.** BET characterization. BET surface area, surface area of micropore ( $S_{\text{micro}}$ ), surface area of mesopore ( $S_{\text{meso}}$ ) and total pore volume of NHPC and Ni-SACs/NHPC.

| Sample       | $S_{\text{BET}}$ (m <sup>2</sup> /g) | $S_{\text{micro}}$ (m <sup>2</sup> /g) | $S_{\text{meso}}$ (m <sup>2</sup> /g) | Total pore volume (cm <sup>3</sup> /g) |
|--------------|--------------------------------------|----------------------------------------|---------------------------------------|----------------------------------------|
| NHPC         | 2115.7                               | 1581.3                                 | 534.4                                 | 1.08                                   |
| Ni-SACs/NHPC | 1115.6                               | 1001.3                                 | 114.3                                 | 0.643                                  |

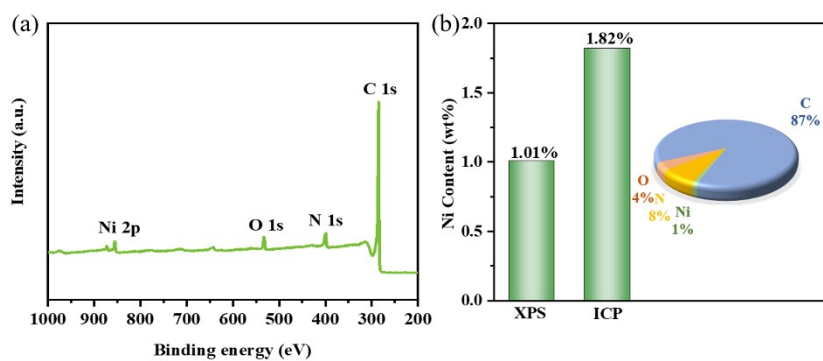

**Fig. S4.** (a)The survey XPS spectra for Ni-SACs/NHPC; (b)Ni content of Ni-



SACs/NHPC from XPS and ICP measurements.

**Table S2.** The parameters for subpeaks in Fig. 2(c).

| Samples      | Subpeaks | Position (eV) | Amount (%) |
|--------------|----------|---------------|------------|
| Ni-SACs/NHPC | C-C      | 284.75        | 21.15      |
|              | C-N      | 285.00        | 31.07      |
|              | C-O      | 285.84        | 26.10      |
|              | C=O      | 288.94        | 21.68      |

**Table S3.** The parameters for subpeaks in Fig. 2(b).

| Samples      | Subpeaks    | Position (eV) | Amount (%) |
|--------------|-------------|---------------|------------|
| Ni-SACs/NHPC | Pyridinic-N | 398.51        | 20.54      |
|              | Ni-N        | 399.27        | 24.46      |
|              | Pyrrolic-N  | 400.86        | 30.83      |
|              | Graphite-N  | 401.75        | 14.35      |
|              | Oxidized-N  | 404.50        | 9.82       |

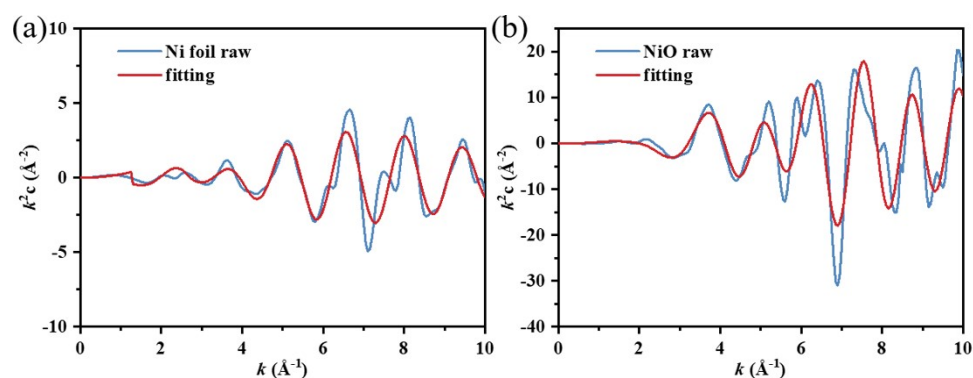

**Fig. S5.** The EXAFS fitting in K-space for (a)Ni-foil; (b)NiO.

**Table S4.** EXAFS fitting parameters at the Ni k-edge various samples( $S_0^2=0.82$ )

| Sample       | Path  | C.N. <sup>[a]</sup> | R (Å) <sup>[b]</sup> | $\sigma$ ( $\times 10^{-3} \text{Å}^2$ ) <sup>[c]</sup> | $\Delta E$ (eV) <sup>[d]</sup> | R factor <sup>[e]</sup> |
|--------------|-------|---------------------|----------------------|---------------------------------------------------------|--------------------------------|-------------------------|
| Ni-foil      | Ni-Ni | 12*                 | 2.49*                | 6.0 $\pm$ 2.0                                           | 6.4 $\pm$ 0.2                  | 0.001                   |
| NiO          | Ni-O  | 6*                  | 2.11*                | 4.6 $\pm$ 1.7                                           | 5.7 $\pm$ 1.7                  | 0.005                   |
|              | Ni-Ni | 12*                 | 2.98*                | 6.8 $\pm$ 0.7                                           |                                |                         |
| Ni-SACs/NHPC | Ni-N  | 3.9 $\pm$ 1.2       | 1.86 $\pm$ 0.03      | 9.0 $\pm$ 6.0                                           | -8.9 $\pm$ 5.3                 | 0.033                   |

<sup>a</sup>C. N.: coordination numbers;

<sup>b</sup>R: bond distance;

<sup>c</sup> $\sigma^2$ : Debye-Waller factors;

<sup>d</sup> $\Delta E_0$ : the inner potential correction.

<sup>e</sup>R factor: goodness of fit.

\*The experimental EXAFS fit by fixing C. N. as the known crystallographic value.

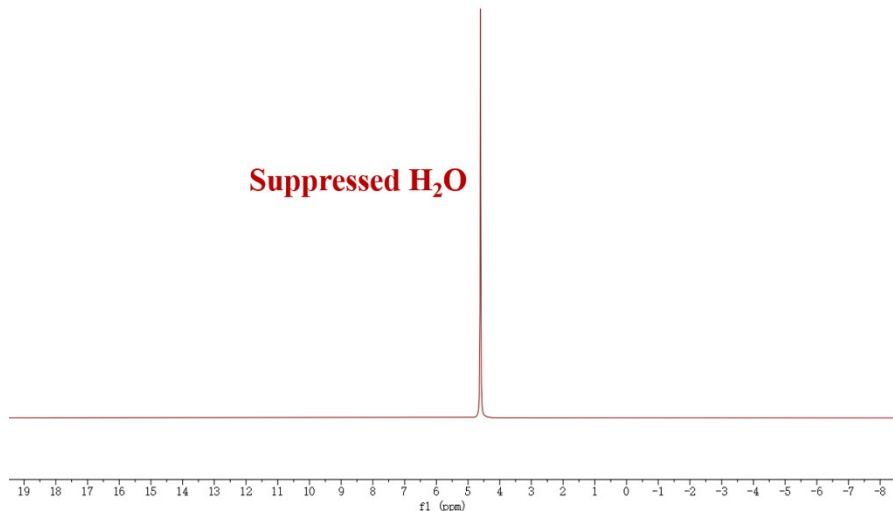

**Fig. S6.** NMR spectra of the electrolyte after CO<sub>2</sub> reduction electrolysis of 9h at potentials of -0.94 V vs.RHE for the Ni-SACs/NHPC.

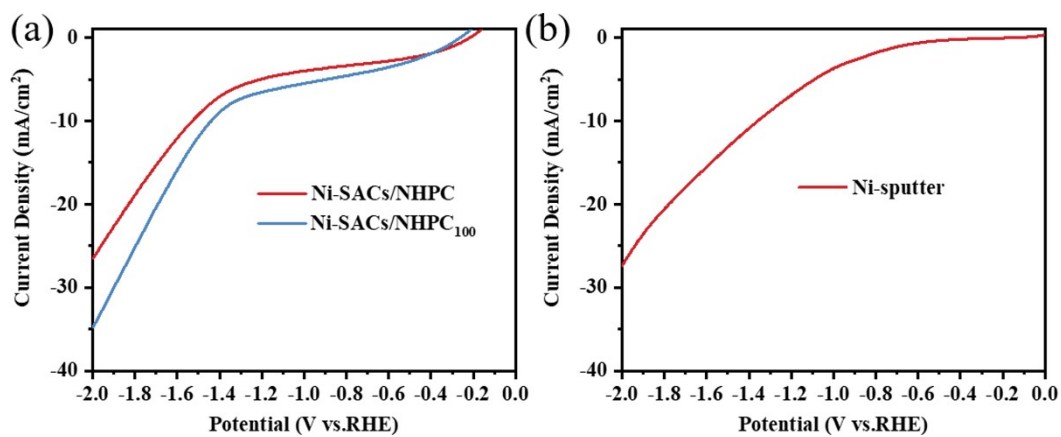

**Fig. S7.** The linear sweep voltammetric (LSV) curves of (a)Ni-SACs/NHPC and Ni-SACs/NHPC<sub>100</sub>; (b)Ni-sputter in CO<sub>2</sub>-saturated 0.1M KHCO<sub>3</sub> electrolyte at a scan rate of 50 mV/s, respectively.

**Table S5 Comparisons of the catalytical performance towards CO production using Ni based single atom catalysts in the H-type cell**

| Catalyst        | Electrolyte            | Potential (vs. RHE) | FE <sub>CO</sub> (%) | J <sub>CO</sub> (mA cm <sup>-2</sup> ) | References |
|-----------------|------------------------|---------------------|----------------------|----------------------------------------|------------|
| Ni-SACs/NHPC    | 0.1M KHCO <sub>3</sub> | -1.04V              | 98.25                | 14.97                                  | this work  |
| PCN-222(Ni)/CNT | 0.5M KHCO <sub>3</sub> | -0.8V               | 52                   | 0.8                                    | 4          |
| Ni/NC           | 0.1M KHCO <sub>3</sub> | -0.8V               | 92.3                 | 4.6                                    | 5          |
| Ni/N-C          | 0.5M KHCO <sub>3</sub> | -0.8V               | 91.1                 | 16.2                                   | 6          |
| Ni-NC_ATPA@C    | 0.5M KHCO <sub>3</sub> | -0.7V               | 93.7                 | 7                                      | 7          |
| Ni-N-C          | 0.1M KHCO <sub>3</sub> | -0.9V               | 94.6                 | 10.5                                   | 8          |

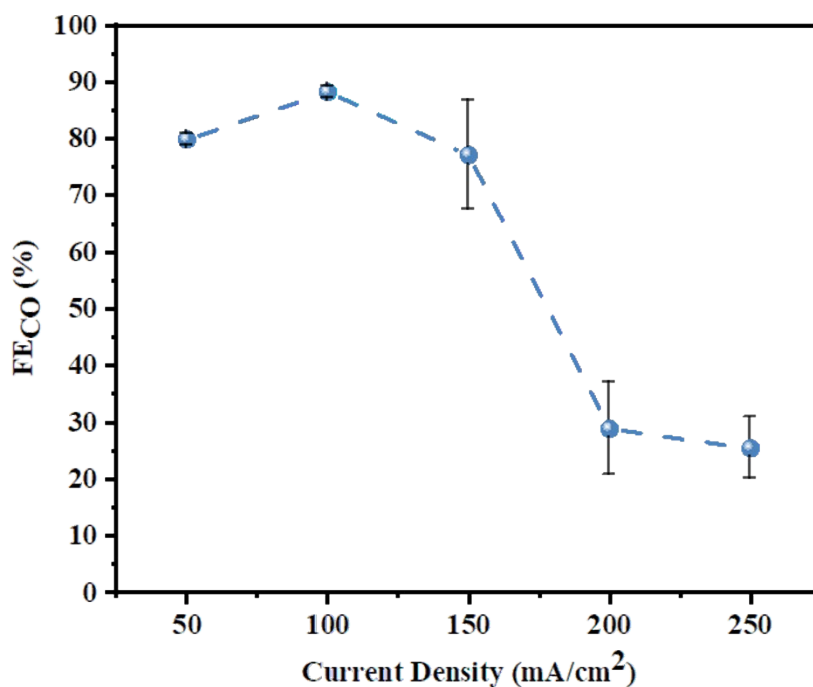

**Fig. S8.** CO Faraday efficiency of Ni-SACs/NHPC at different current densities in a flow cell system

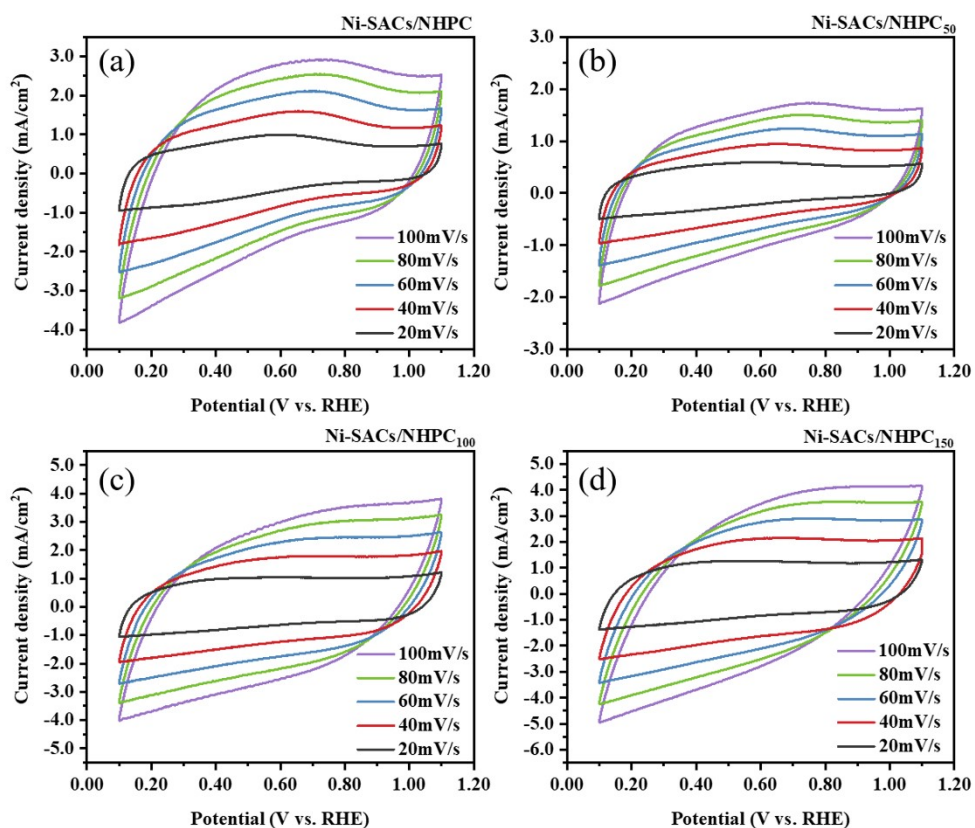

**Fig. S9.** Cyclic voltammety measurements for Ni-SACs/NHPC, Ni-SACs/NHPC<sub>50</sub>, Ni-SACs/NHPC<sub>100</sub> and Ni-SACs/NHPC<sub>150</sub> performed at different scan rates e.g., 20, 40, 60, 80, and 100 mV/s.

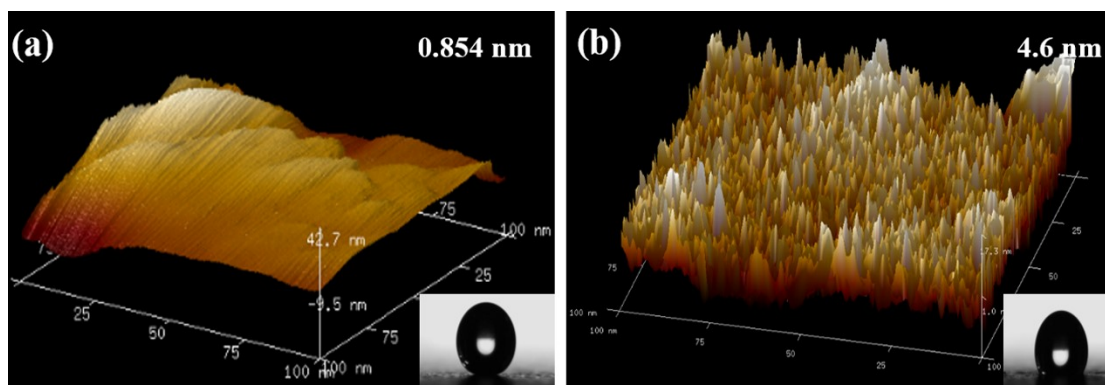

**Fig. S10.** Comparisons of AFM images and contact angle measurements of carbon substrate without (a) and with plasma treatment (b).

- 1 G. Kresse, J. Furthmüller. *Physical Review B*, 1996, 54.
- 2 John, P., Perdew. *Physical Review Letters*, 1996, 77(3865-3868).
- 3 V. Wang, N. Xu, J.C. Liu. 2019, 108033.
- 4 M. Liu, M. Peng, B. Dong. *Chinese Journal of Structural Chemistry*, 2022, 41(7): 2207046-2207052.
- 5 F. Li, S. Hong, T.-S. Wu. *ACS Applied Energy Materials*, 2019, 2(12): 8836-8842.
- 6 S.-J. Zheng, H. Cheng, J. Yu. *Rare Metals*, 2023, 42(6): 1800-1807.
- 7 M.W. Jia, C. Choi, T.S. Wu. *Chemical Science*, 2018, 9(47): 8775-8780.
- 8 X.X. Huang, Y.J. Ma, L.J. Zhi. *Acta Physico-Chimica Sinica*, 2022, 38(2).
